# Supplementary material
Source: MDPI journal article supplement (https://www.mdpi.com/2076-3417/14/8/3504)
Supplement: s1 [file s1]

## Supplementary Material

Mathematical Models used in the SOFC [36].

| Component                                                             | Equations                                                                                                                                                                                                                   |
|-----------------------------------------------------------------------|-----------------------------------------------------------------------------------------------------------------------------------------------------------------------------------------------------------------------------|
| Electrochemical reaction                                              | $H_2 + 0.5O_2 \xrightarrow{yields} H_2O \quad (T_{SOFC} \cdot \Delta s + \Delta g) \quad (S1)$                                                                                                                              |
| Ideal efficiency                                                      | $\eta_{H_2}^0 = \Delta g / \Delta h \quad (S2)$                                                                                                                                                                             |
| Open Circuit                                                          | $U^{OCP} = \eta_{H_2}^0 - \frac{R \cdot T_{SOFC}}{2F} \ln \left[ \frac{P_{H_2O,TPB}}{P_{H_2,TPB} \cdot P_{O_2,TPB}^{0.5}} \right] \quad (S3)$                                                                               |
| Fuel cell potential                                                   | $U = U^{OCP} - (\eta_{ohm} + \eta_{conc} + \eta_{act,a} + \eta_{act,c}) \quad (S4)$                                                                                                                                         |
| Fuel Cell output power                                                | $P_{SOFC} = U \cdot j \cdot L \cdot W \quad (S5)$                                                                                                                                                                           |
| Fuel cell electric efficiency                                         | $\eta_{SOFC} = \frac{P_{SOFC}}{(\dot{n}_{CH_4} LHV_{CH_4} + \dot{n}_{H_2} LHV_{H_2} + \dot{n}_{CO} LHV_{CO})} \quad (S6)$                                                                                                   |
| Fuel Utilization                                                      | $\eta_f = \frac{\Delta_{(in-out)} \dot{n}_{[H_2+CO+CH_4]}}{\dot{n}_{[H_2+CO+CH_4]_{in}}} \quad (S7)$                                                                                                                        |
| Fuel cell overall efficiency                                          | $\eta_o = \eta_f \cdot \frac{\Delta g}{\Delta h} \cdot \frac{U}{U^{OCP}} \quad (S8)$                                                                                                                                        |
| Ohmic polarization                                                    | $\eta_{ohm} = j \cdot R_{ohm} = j \cdot \left( \frac{\tau_{anode}}{\sigma_{anode}} + \frac{\tau_{ele}}{\sigma_{ele}} + \frac{\tau_{cathode}}{\sigma_{cathode}} \right) \quad (S9)$                                          |
| Concentration polarization                                            | $\eta_{conc} = \frac{R \cdot T_{SOFC}}{2F} \ln \left[ \frac{P_{H_2O,TPB} \cdot P_{H_2,f}}{P_{H_2,TPB} \cdot P_{H_2O,f}} \right] + \frac{R \cdot T_{SOFC}}{4F} \ln \left[ \frac{P_{O_2,a}}{P_{O_2,TPB}} \right] \quad (S10)$ |
| Anode activation polarization                                         | $\eta_{act,anode} = \frac{R \cdot T_{SOFC}}{F n_e} \sinh^{-1} \left( \frac{j}{2j_{0,anode}} \right) \quad (S11)$                                                                                                            |
| Cathode activation polarization                                       | $\eta_{act,cathode} = \frac{R \cdot T_{SOFC}}{F n_e} \sinh^{-1} \left( \frac{j}{2j_{0,cathode}} \right) \quad (S12)$                                                                                                        |
| Anode exchange density                                                | $j_{0,anode} = \frac{R \cdot T_{SOFC}}{F n_e} k_{anode} \exp \left( -\frac{E_{anode}}{RT_{SOFC}} \right) \quad (S13)$                                                                                                       |
| Cathode exchange density                                              | $j_{0,cathode} = \frac{R \cdot T_{SOFC}}{F n_e} k_{cathode} \exp \left( -\frac{E_{cathode}}{RT_{SOFC}} \right) \quad (S14)$                                                                                                 |
| The partial pressure of H <sub>2</sub> at the triple phase boundary   | $P_{H_2,TPB} = P_{H_2,f} - \frac{RT_{SOFC} \tau_{anode}}{2F D_{eff,anode}} j \quad (S15)$                                                                                                                                   |
| The partial pressure of H <sub>2</sub> O at the triple phase boundary | $P_{H_2O,TPB} = P_{H_2O,f} + \frac{RT_{SOFC} \tau_{anode}}{2F D_{eff,anode}} j \quad (S16)$                                                                                                                                 |
| The partial pressure of O <sub>2</sub> at the triple phase boundary   | $P_{O_2,TPB} = P - (P - P_{O_2,a}) \exp \frac{RT_{SOFC} \tau_{cathode}}{4F D_{eff,cathode} P} \cdot j \quad (S17)$                                                                                                          |
| Electrochemical reaction heat released                                | $Q_{elec} = T_{SOFC} \cdot \Delta s - j \cdot (\eta_{ohm} + \eta_{conc} + \eta_{act,a} + \eta_{act,c}) \quad (S18)$                                                                                                         |
| Mass balance                                                          | $M_{i,in} + \sum_k C_{i,k} r_k = M_{i,out} \quad (S19)$<br>Where $r_k = (j \cdot N_{cells} \cdot A) / (n_e F)$                                                                                                              |

Energy balance equation in  
SOFC

$$\sum_{in} m_{in} c p_{in} T_{in} - P_{SOFC} = \sum_{out} m_{out} c p_{out} T_{SOFC} \quad (S20)$$
